## North American deer mice are susceptible to SARS-CoV-2

Bryan D. Griffin<sup>1</sup>, Mable Chan<sup>1</sup>, Nikesh Tailor<sup>1</sup>, Emelissa J. Mendoza<sup>1</sup>, Anders Leung<sup>1</sup>, Bryce M. Warner<sup>1,2</sup>, Ana T. Duggan<sup>3</sup>, Estella Moffat<sup>4</sup>, Shihua He<sup>1</sup>, Lauren Garnett<sup>1,2</sup>, Kaylie N. Tran<sup>1</sup>, Logan Banadyga<sup>1</sup>, Alixandra Albiertz<sup>1</sup>, Kevin Tierney<sup>1</sup>, Jonathan Audet<sup>1</sup>, Alexander Bello<sup>1</sup>, Robert Vendramelli<sup>1</sup>, Amrit S. Boese<sup>1</sup>, Lisa Fernando<sup>1</sup>, L. Robbin Lindsay<sup>1,5</sup>, Claire M. Jardine<sup>6</sup>, Heidi Wood<sup>1</sup>, Guillaume Poliquin<sup>2,7,8</sup>, James E. Strong<sup>1,2,7</sup>, Michael Drebot<sup>1,2</sup>, David Safronetz<sup>1,2</sup>, Carissa Embury-Hyatt<sup>4</sup>, Darwyn Kobasa<sup>1,2</sup> \*

### Affiliations:

<sup>1</sup>Zoonotic Diseases and Special Pathogens Program, National Microbiology Laboratory, Public Health Agency of Canada, 1015 Arlington Street, Winnipeg, Manitoba, Canada R3E 3R2

<sup>2</sup>Department of Medical Microbiology and Infectious Diseases, College of Medicine, Faculty of Health Sciences, University of Manitoba, 745 Bannatyne Avenue, Winnipeg, Manitoba, Canada R3E 0J9

<sup>3</sup>Science Technology Cores and Services, National Microbiology Laboratory, Public Health Agency of Canada, 1015 Arlington Street, Winnipeg, Manitoba, Canada R3E 3R2.

<sup>4</sup>National Centre for Foreign Animal Disease, Canadian Food Inspection Agency, 1015 Arlington Street, Winnipeg, Manitoba, Canada R3E 3M4

<sup>5</sup>Department of Entomology, University of Manitoba, Winnipeg, Manitoba, Canada R3T 2N2,

<sup>6</sup>Department of Pathobiology, Canadian Wildlife Health Cooperative, Department of Pathobiology, University of Guelph, Guelph, Ontario, Canada N1G 2W1

<sup>7</sup>Pediatrics & Child Health, College of Medicine, Faculty of Health Sciences, University of Manitoba, 745 Bannatyne Avenue, Winnipeg, Manitoba, Canada R3E 0J9

<sup>8</sup>Office of the Scientific Director, National Microbiology Laboratories, Public Health Agency of Canada, Winnipeg, MB, Canada R3E 3R2

\*Corresponding author: [darwyn.kobasa@canada.ca](mailto:darwyn.kobasa@canada.ca)

**Keywords:** Severe Acute Respiratory Syndrome-coronavirus 2, SARS-CoV-2, coronavirus disease 2019, COVID-19, pandemic, angiotensin-converting enzyme 2 (Ace2), virology, infection, host specificity, species specificity, zoonoses, zoonoanthroposis, reverse zoonosis, animal reservoir, re-emergence, virus shedding, virus transmission, real-time polymerase chain reaction, *Cricetidae*, *Mesocricetus auratus*, deer mice, *Peromyscus maniculatus*, white footed mouse, *Peromyscus leucopus*

## 45 **Abstract**

46 The zoonotic spillover of the pandemic SARS-coronavirus 2 (SARS-CoV-2) from an animal  
47 reservoir, currently presumed to be the Chinese horseshoe bat, into a naïve human population has  
48 rapidly resulted in a significant global public health emergency. Worldwide circulation of SARS-  
49 CoV-2 in humans raises the theoretical risk of reverse zoonosis events with wildlife,  
50 reintroductions of SARS-CoV-2 into permissive non-domesticated animals, potentially seeding  
51 new host reservoir species and geographic regions in which bat SARS-like coronaviruses have  
52 not historically been endemic. Here we report that North American deer mice (*Peromyscus*  
53 *maniculatus*) and some closely related members of the *Cricetidae* family of rodents possess key  
54 amino acid residues within the angiotensin-converting enzyme 2 (ACE2) receptor known to  
55 confer SARS-CoV-2 spike protein binding. *Peromyscus* rodent species are widely distributed  
56 across North America and are the primary host reservoirs of several emerging pathogens that  
57 repeatedly spill over into humans including *Borrelia burgdorferi*, the causative agent of Lyme  
58 disease, deer tick virus, and Sin Nombre orthohantavirus, the causative agent of hantavirus  
59 pulmonary syndrome (HPS). We demonstrate that adult deer mice are susceptible to SARS-CoV-  
60 2 infection following intranasal exposure to a human isolate, resulting in viral replication in the  
61 upper and lower respiratory tract with little or no signs of disease. Further, shed infectious virus  
62 is detectable in nasal washes, oropharyngeal and rectal swabs, and viral RNA is detectable in  
63 feces and occasionally urine. We further show that deer mice are capable of transmitting SARS-  
64 CoV-2 to naïve deer mice through direct contact. The extent to which these observations may  
65 translate to wild deer mouse populations remains unclear, and the risk of reverse zoonosis and/or  
66 the potential for the establishment of *Peromyscus* rodents as a North American reservoir for  
67 SARS-CoV-2 is unknown. Nevertheless, efforts to monitor wild, peri-domestic *Peromyscus*  
68 rodent populations are likely warranted as the SARS-CoV-2 pandemic progresses.

69

## 70 **Main text**

71 Severe acute respiratory syndrome coronavirus 2 (SARS-CoV-2) is the causative agent of  
72 coronavirus disease 2019 (COVID-19), an acute respiratory illness that emerged in Wuhan,  
73 China in late 2019<sup>1</sup>, initiating a global pandemic associated with millions of infections, hundreds  
74 of thousands of deaths, and severe social and economic disruption. SARS-CoV-2, a positive-  
75 sense RNA virus of the betacoronavirus genus, is closely related to the high-consequence  
76 respiratory viruses, SARS-CoV and Middle East respiratory syndrome coronavirus (MERS-  
77 CoV). While the majority of SARS-CoV-2 infections result in asymptomatic<sup>2,3</sup> or mild  
78 respiratory disease<sup>4,5</sup> some individuals progress to more severe disease that can result in  
79 admittance to an intensive care unit (ICU) and/or the need for oxygen therapy or invasive  
80 mechanical ventilation and can result in serious multi-organ sequelae and death. The severity of  
81 disease and likelihood of mortality often correlates with advanced age, compromised immune  
82 status, and the pre-existence of certain cardiovascular, pulmonary, and metabolic co-  
83 morbidities<sup>4,6</sup>. Human-to-human transmission of SARS-CoV-2 is believed to occur primarily  
84 through short-range respiratory droplets and aerosols emitted by infected individuals during  
85 coughing, sneezing, speaking, breathing, or as a result of aerosol-generating medical  
86 procedures<sup>7</sup>. Individuals ranging from pre-symptomatic, asymptomatic, mildly symptomatic to  
87 fulminant symptomatic are thought to be capable of transmitting SARS-CoV-2<sup>8,9</sup>.

88 Like the other non-seasonal human coronaviruses, SARS-CoV<sup>10,11</sup> and MERS-CoV<sup>12,13</sup>, SARS-  
89 CoV-2 is believed to be of bat origin<sup>11,14,15</sup> although related viruses have also been identified in  
90 wild pangolins<sup>16</sup>. Examinations of amino acid sequences of the SARS-CoV-2 receptor,  
91 angiotensin-converting enzyme 2 (Ace2), from various vertebrate species predicts that additional  
92 wild animal species may be susceptible<sup>17,18</sup>. Several experimental animal models of SARS-CoV-  
93 2 infection have been reported including transgenic mice that express human Ace2 (hAce2)<sup>19,20</sup>  
94 and mouse-adapted SARS-CoV-2<sup>21,22</sup> as well as tree shrews<sup>23</sup>, hamsters<sup>24,25</sup>, ferrets<sup>26,27</sup>, fruit  
95 bats<sup>28</sup>, rhesus macaques<sup>29</sup>, cynomolgus macaques<sup>30</sup>, marmosets<sup>30</sup>, and African green monkeys<sup>31</sup>  
96 that are innately susceptible to infection with wildtype SARS-CoV-2. Experimental transmission  
97 by both direct and indirect contact has been reported for hamsters<sup>24,25</sup>, ferrets<sup>27</sup>, and domestic  
98 cats<sup>26,32</sup>. Lastly, there have been documented instances of unintentional human-to-animal  
99 transmission (zoonoanthroposis) with several species of captive or domesticated animals  
100 including tigers<sup>33</sup>, mink<sup>34</sup>, cats<sup>26,35</sup>, and dogs<sup>36</sup>.

101 After Syrian hamsters (*Mesocricetus auratus*) were identified to be a SARS-CoV-2-susceptible  
102 host species<sup>24,25</sup>, we sought to determine whether or not deer mice (*Peromyscus maniculatus*)  
103 were also susceptible hosts since they, like hamsters, are members of the *Cricetidae* family of  
104 rodents (Fig. 1a). *Peromyscus* species rodents are susceptible to persistent infections with and are  
105 the natural host reservoirs of several important zoonotic pathogens including: *Borrelia*  
106 *burgdorferi*, the causative agent of Lyme disease<sup>37,38</sup>, deer tick virus (DTV)<sup>39</sup>, and Sin Nombre  
107 orthohantavirus (SNV)<sup>40,41</sup>. Deer mice and closely related white-footed mice (*Peromyscus*  
108 *leucopus*) are widely distributed across North America (Fig. 1b). We examined deer mouse Ace2  
109 for congruence with human Ace2 (hAce2) at key amino acid residues known to confer efficient  
110 binding to the SARS-CoV-2 Spike (S) (Fig. 1c) and came to a conclusion consistent with recent  
111 reports that deer mice were likely to be susceptible hosts<sup>17,42</sup>. We found that deer mouse Ace2  
112 differed from hAce2 S-contacting residues at four locations and that the amino acid differences  
113 were unlikely to have a detrimental effect on S binding efficiency<sup>43</sup>. We further found that Ace2  
114 belonging to the white-footed mouse had in common all but three hAce2 S-contacting residues,  
115 and white-footed mouse Ace2 has since been shown to bind S and confer entry to SARS-CoV-2  
116 into Hela cells<sup>18</sup>.

117 Here, eight to thirty two-week old male or female deer mice (*P. maniculatus rufinus*; in-house  
118 colony) were inoculated with 10<sup>5</sup> TCID<sub>50</sub> of SARS-CoV-2 by an intranasal route (i.n.) and  
119 monitored daily for clinical signs and weight loss for 21 days or necropsied at 2 and 4 day post-  
120 infection (dpi). SARS-CoV-2-exposed deer mice seldom displayed clinical signs (occasionally  
121 presenting with ruffled fur), and no animals succumbed to infection (Fig. 2a) or lost weight (Fig.  
122 2b) at any point post-infection with no differences noted related to age. At 2 dpi high levels of  
123 viral RNA (vRNA; ~10<sup>8</sup>-10<sup>10</sup> genome equivalents/g) were detected in the nasal turbinates and  
124 lungs, and infectious virus (up to 3.3x10<sup>7</sup> TCID<sub>50</sub>/g and 1.5x10<sup>7</sup> TCID<sub>50</sub>/g) was detected in the  
125 nasal turbinates and lungs (Fig. 2 c-d). At 4 dpi infectious virus detected in the nasal turbinates  
126 had declined by several logs while lungs titers had declined to a lesser extent (ranging from  
127 3x10<sup>3</sup> to 1.4x10<sup>5</sup> TCID<sub>50</sub>/g and 6.8x10<sup>4</sup> to 3.4x10<sup>6</sup> TCID<sub>50</sub>/g, respectively). Age did not make a  
128 significant contribution to the viral burden detected in the tissues (Extended Data Fig. 1). At 2  
129 and 4 dpi high levels of vRNA (~10<sup>5</sup> – 10<sup>8</sup> genome copies/g) were detected in the small intestine  
130 and colon tissues (Fig. 2 e-f), and infectious virus was present at a low level. To monitor viral  
131 shedding, oropharyngeal and rectal swabs were collected every 2 days from 2-8 dpi (Fig. 2g-h).  
132 High levels of vRNA (~10<sup>5</sup> – 10<sup>7</sup> genome copies/ml) were detected on 2 and 4 dpi in  
133 oropharyngeal swabs, and both vRNA and infectious virus peaked at 2 dpi and declined

134 thereafter (Fig. 2g). Moderate levels of vRNA ( $\sim 10^3 - 10^5$  genome copies/ml) were detected on 2  
135 and 4 dpi in rectal swabs, and vRNA peaked at 2 dpi and declined thereafter (Fig. 2h). Infectious  
136 virus in rectal swabs was detected on 2, 4, 6, and 8 dpi at or near the limit of detection (Fig. 2h).  
137 Viral RNA was detected in nasal washes at 6 dpi in the four deer mice for which samples were  
138 obtained ( $\sim 10^5 - 10^6$  genome copies/ml) (Fig. 2i). An additional experimental group of deer mice  
139 ( $n = 5$ ) were inoculated i.n. with  $10^6$  TCID<sub>50</sub> of SARS-CoV-2. In this group vRNA was detected  
140 in urine samples at 6 dpi in one deer mouse ( $\sim 10^4$  genome copies/ml) (Fig. 2j) and feces at 4 dpi  
141 in all deer mice ( $\sim 10^4 - 10^6$  genome copies/g) (Fig. 2k). Viral RNA in blood was detected on 1  
142 dpi, indicating transient viremia that declined in most animals by 3 dpi (Fig. 2l). Studies to  
143 examine the vectorial capacity of selected tick species such as *Ixodes scapularis* for SARS-CoV2  
144 may be warranted. An additional experimental group of deer mice ( $n = 4$ ) was inoculated i.n.  
145 with  $10^5$  TCID<sub>50</sub> of SARS-CoV-2, and tissues were harvested at 21 dpi (Fig. 2m). In this group  
146 vRNA was detected in the nasal turbinates ( $\sim 10^5 - 10^7$  genome copies/g) and lungs ( $\sim 10^4 - 10^6$   
147 genome copies/g) of all deer mice and in the small intestine of two deer mice ( $\sim 10^4$  genome  
148 copies/g), indicating persistence of vRNA in organs that to our knowledge has not been reported  
149 in other animal models studied thus far.

150 Lesions in animals infected at  $10^5$  TCID<sub>50</sub> were largely absent from nasal turbinates except for  
151 mild neutrophilic infiltration in the submucosa at 4 dpi (Fig. 3a, left panel). Abundant vRNA was  
152 primarily detected in epithelial cells at 2 and 4 dpi (Fig. 3a, middle panels) and anti-genomic  
153 RNA could be detected occasionally in epithelial cells at 2 dpi only (Fig. 3a, right panels).  
154 Histopathologic examination of lung tissue revealed lesions that included perivascular and  
155 peribronchiolar infiltrations of histiocytes and neutrophils with occasional multinucleated  
156 syncytial cells (Fig. 3b, left panel). Occasional discrete foci of interstitial pneumonia were  
157 observed (Fig. 3b, left panel). Abundant vRNA was primarily detected in bronchiolar epithelial  
158 cells and occasionally in the interstitium (Fig. 3b, middle panels). Anti-genomic RNA could be  
159 detected in individual scattered bronchiolar epithelial cells (Fig. 3b, right panels). Lung lesions  
160 were largely absent at 21 dpi although some foci of inflammation with syncytia were identified,  
161 and vRNA was not detected in the lungs by ISH despite qRT-PCR positivity (Extended Data Fig.  
162 2).

163  
164 Blood biochemistry and hematological parameters were compared for uninfected ( $n = 5$ ) and  
165 SARS-CoV-2-infected deer mice ( $n = 3$ ;  $10^6$  TCID<sub>50</sub>) (Fig. 4a-e). Both groups showed similar  
166 levels of white blood cells; however, infected deer mice had reduced lymphocyte counts and  
167 elevated neutrophil counts (Fig. 4a). These data appear to recapitulate the trend in hematologic  
168 values observed in COVID-19 patients, where lymphocytopenia with elevated neutrophil counts  
169 can occur<sup>44</sup>. One out of three infected deer mice had a dramatically elevated neutrophil-to-  
170 lymphocyte rate (NLR), a clinical metric that has been found to be elevated in human patients  
171 during severe COVID-19<sup>45</sup>, and the NLR was significantly elevated in all infected deer mice ( $P$   
172  $< 0.05$ , Mann-Whitney test). The lack of a difference in alanine aminotransferase (ALT) (Fig.  
173 4c), and the reduced values for blood albumin (ALB) (Fig. 4d) and blood urea nitrogen (BUN)  
174 (Fig. 4e), when uninfected and infected deer mice were compared suggests that infection did not  
175 cause liver and kidney impairment. Additional serum biochemical values were unremarkable  
176 (Extended Data Fig. 3). Transcriptional profiling of host cytokine expression in the lungs by real-  
177 time PCR using a previously reported panel that includes TNF $\alpha$ , IL-6, IL10, and IFN $\alpha$ <sup>46</sup> was  
178 carried out 2 dpi (Fig. 4f) and compared to uninfected controls ( $n = 6$ ). TNF $\alpha$  and IL-6 mRNA  
179 expression was elevated in all infected mice (mean fold changes of  $2^{2.7}$  and  $2^{3.5}$ , respectively). IL-



180 10 mRNA expression was elevated in five out of six infected animals and reduced in one (mean  
181 fold change of  $2^{1.5}$ ). In contrast, IFN $\alpha$  was elevated in two and reduced in four infected deer  
182 mice (mean fold change of  $2^{-0.8}$ ). Overall, the mRNA levels of inflammatory cytokines (TNF $\alpha$ ,  
183 IL-6, and IL10) were slightly elevated compared to what is seen in the lungs of deer mice ( $\sim 2 - 5$   
184 fold increase) following experimental infection with SNV<sup>47</sup>. All five deer mice infected at  $10^5$   
185 TCID<sub>50</sub> had detectable serum IgG titers against mixed spike/nucleoprotein (S/N) antigen as  
186 assessed by ELISA at 14 dpi (OD 2.7 – 2.8 at 1:100) (Fig. 4g), and neutralizing antibodies by 28  
187 dpi (plaque reduction neutralization test (PRNT<sub>90</sub>) 1:40 to 1:320) (Fig. 4h).

188  
189 Transmission by direct contact was examined between SARS-CoV-2-infected and naïve deer  
190 mice (experimental design schematic, Extended Data Fig. 4). Five adult male and female deer  
191 mice, infected i.n. with  $10^6$  TCID<sub>50</sub> SARS-CoV-2 were each transferred to a new cage at 1 dpi  
192 and co-housed with a single naïve contact deer mouse (1:1 ratio; zero days post-direct contact  
193 (dpc)). Oropharyngeal and rectal swab samples taken every other day revealed that initially one  
194 contact animal (DM7, Fig. 5 a-b) rapidly became infected and shed moderate levels of vRNA as  
195 early as 2 dpc. The level of vRNA in both swab samples from DM7 continued to increase for the  
196 next 4 (oropharyngeal swabs) or 2 (rectal swabs) days then declined. The remaining contact deer  
197 mice had detectable vRNA in oropharyngeal and rectal swab samples at low levels from 2 - 4  
198 dpc which declined until 10 dpc when shed vRNA was again detected in both oropharyngeal and  
199 rectal swabs from all contact deer mice (including DM7). Interestingly, despite the high  
200 challenge dose administered to donor deer mice only low amounts of infectious virus were  
201 detected in swabs (Fig. 5c-d). Infectious virus was detected in oropharyngeal and rectal swabs of  
202 contact deer mouse DM7 at 4 dpc and an oropharyngeal swab sample from contact deer mouse  
203 DM6 at 10 dpc. An additional transmission study was carried out in the same manner and nasal  
204 wash, nasal turbinates, and lung samples were collected from contact animals at 2 and 4 dpc  
205 (Fig. 5e-f). Viral RNA was detected in nasal wash, nasal turbinates, and the lungs of contact deer  
206 mice DM19 (2 dpc) and DM30 (4 dpc), as well as in the nasal wash of deer mouse DM17 (2  
207 dpc), DM26 (4 dpc) and DM28 (4 dpc). IgG against mixed SARS-CoV-2 spike/nucleoprotein  
208 antigens were detected in deer mouse DM7 at 21 dpc, indicating seroconversion and confirming  
209 that direct contact transmission had occurred (Fig. 5g). A similar, but more stringent  
210 transmission study was carried out using a lower dose of virus ( $10^5$  TCID<sub>50</sub>), and donor and naïve  
211 deer mice were mixed at 2 dpi (Fig. 5h-i). Oropharyngeal and rectal swab samples taken every  
212 other day revealed that contact deer mice had detectable vRNA in both oropharyngeal and rectal  
213 swab samples from 2 - 4 dpc at a low levels, which declined until 6-10 dpc after which shed  
214 vRNA was again detected in oropharyngeal swabs from four out of five and rectal swabs from  
215 three out of five contacts. At 21 dpc vRNA was detected in the oropharyngeal swabs of two of  
216 five contact and was not detected in any rectal swab samples.

217  
218 The described experiments demonstrate that adult deer mice are susceptible to experimental  
219 infection with a human isolate of SARS-CoV-2, resulting in asymptomatic infection or mild  
220 disease with lesions limited to mild lung pathology, despite a high viral burden and elevated  
221 levels of inflammatory cytokines in the lungs and seroconversion. The detected RNA viremia in  
222 SARS-CoV-2-infected deer mice appears to be more transient than what is observed in deer mice  
223 experimentally infected with SNV<sup>48</sup>; however, the viral shedding and the propensity for direct  
224 contact transmission appears to be greater<sup>41,48</sup>. The relatively low amount of shed infectious virus  
225 from nasal, oral, and rectal routes consistently result in direct contact transmission from infected

226 to co-housed naive deer mice. SNV is also detectable in deer mouse feces and urine, and  
227 zoonotic transmission of SNV into humans is thought to result from unintentional ingestion or  
228 inhalation of contaminated deer mouse excreta<sup>49</sup>. Additional studies should be carried out to  
229 determine if vRNA detected in the feces and occasionally urine is indicative of the presence  
230 infectious virus.

231 Concerns have justifiably been raised about the potential for reverse zoonosis, human-to-animal  
232 transmission of SARS-CoV-2 into susceptible wild animal host species<sup>50</sup>. The introduction of  
233 novel pathogens into susceptible wildlife hosts can have devastating effects on wildlife  
234 populations<sup>51</sup>. The findings reported here suggest that the impacts of SARS-CoV-2 on infected  
235 *Peromyscus* species rodents are likely to be minimal; however, wild deer mouse populations may  
236 be more or less susceptible to infection than the experimentally housed animals we have  
237 described. An additional concern is the potential for zoonotic maintenance of SARS-CoV-2 in an  
238 animal reservoir and/or geographic region where SARS-like coronaviruses had not previously  
239 been endemic. The findings reported here are concerning in light of the fact that *Peromyscus*  
240 species rodents tolerate persistent infection with and serve as the primary reservoirs for several  
241 emerging zoonotic pathogens that spillover into humans, including *Borrelia burgdorferi*<sup>37,38</sup>,  
242 DTV<sup>39</sup>, and SNV<sup>40,41</sup>. It should be acknowledged that although deer mice are widely distributed  
243 in North America and can live in close proximity to humans, the actual risk of human-to-deer  
244 mouse transmission remains unknown. Further, it remains unclear how well the transmission  
245 studies we describe translate to the risk of sustained transmission within wild deer mouse  
246 populations. The theoretical risk of zoonotic transmission of SARS-CoV-2 back to humans from  
247 *Peromyscus* species rodents would depend on additional unknowns such as whether infectious  
248 virus is present in excreta at high enough levels to initiate human infection and whether other  
249 wild or domestic animal species might serve as an intermediary host. Efforts to monitor wild,  
250 especially peri-domestic *Peromyscus* rodent populations are likely warranted as the SARS-CoV-  
251 2 pandemic continues to progress.

252 Lastly, we suggest that the deer mouse model of SARS-CoV-2 infection, as a largely outbred  
253 small animal model, may prove useful for studying viral pathogenesis and for evaluating the  
254 protective efficacy of experimental vaccines and therapeutics.

255

## 256 References

257

- 258 1 Zhu, N. *et al.* A Novel Coronavirus from Patients with Pneumonia in China, 2019. *N. Engl. J. Med.*,  
259 doi:10.1056/NEJMoa2001017 (2020).
- 260 2 Poletti, P. *et al.* Probability of symptoms and critical disease after SARS- CoV-2 infection, Preprint at:  
261 <https://arxiv.org/pdf/2006.08471.pdf> (2020).
- 262 3 O, B. *et al.* Estimating the Extent of True Asymptomatic COVID-19 and Its Potential for Community  
263 Transmission: Systematic Review and Meta-Analysis Preprint at:  
264 <https://www.medrxiv.org/content/10.1101/2020.05.10.20097543v2> (2020).
- 265 4 Huang, C. *et al.* Clinical features of patients infected with 2019 novel coronavirus in Wuhan, China. *Lancet*  
266 **395**, 497-506, doi:10.1016/S0140-6736(20)30183-5 (2020).
- 267 5 Guan, W. J. *et al.* Clinical Characteristics of Coronavirus Disease 2019 in China. *N. Engl. J. Med.* **382**,  
268 1708-1720, doi:10.1056/NEJMoa2002032 (2020).
- 269 6 Zhou, F. *et al.* Clinical course and risk factors for mortality of adult inpatients with COVID-19 in Wuhan,  
270 China: a retrospective cohort study. *Lancet* **395**, 1054-1062, doi:10.1016/S0140-6736(20)30566-3 (2020).
- 271 7 Prather, K. A., Wang, C. C. & Schooley, R. T. Reducing transmission of SARS-CoV-2. *Science* **368**, 1422-  
272 1424, doi:10.1126/science.abc6197 (2020).

- 273 8 Li, R. *et al.* Substantial undocumented infection facilitates the rapid dissemination of novel coronavirus  
274 (SARS-CoV-2). *Science* **368**, 489-493, doi:10.1126/science.abb3221 (2020).
- 275 9 Moghadas, S. M. *et al.* The implications of silent transmission for the control of COVID-19 outbreaks.  
276 *Proc. Natl. Acad. Sci. U. S. A.*, doi:10.1073/pnas.2008373117 (2020).
- 277 10 Guan, Y. *et al.* Isolation and characterization of viruses related to the SARS coronavirus from animals in  
278 southern China. *Science* **302**, 276-278, doi:10.1126/science.1087139 (2003).
- 279 11 Hu, B. *et al.* Discovery of a rich gene pool of bat SARS-related coronaviruses provides new insights into  
280 the origin of SARS coronavirus. *PLoS Pathog.* **13**, e1006698, doi:10.1371/journal.ppat.1006698 (2017).
- 281 12 Memish, Z. A. *et al.* Middle East respiratory syndrome coronavirus in bats, Saudi Arabia. *Emerg. Infect.*  
282 *Dis.* **19**, 1819-1823, doi:10.3201/eid1911.131172 (2013).
- 283 13 Lau, S. K. P. *et al.* Receptor Usage of a Novel Bat Lineage C Betacoronavirus Reveals Evolution of Middle  
284 East Respiratory Syndrome-Related Coronavirus Spike Proteins for Human Dipeptidyl Peptidase 4  
285 Binding. *J. Infect. Dis.* **218**, 197-207, doi:10.1093/infdis/jiy018 (2018).
- 286 14 Zhou, P. *et al.* A pneumonia outbreak associated with a new coronavirus of probable bat origin. *Nature*,  
287 doi:10.1038/s41586-020-2012-7 (2020).
- 288 15 Ge, X. Y. *et al.* Isolation and characterization of a bat SARS-like coronavirus that uses the ACE2 receptor.  
289 *Nature* **503**, 535-538, doi:10.1038/nature12711 (2013).
- 290 16 Lam, T. T. *et al.* Identifying SARS-CoV-2-related coronaviruses in Malayan pangolins. *Nature*,  
291 doi:10.1038/s41586-020-2169-0 (2020).
- 292 17 Damas, J. *et al.* Broad Host Range of SARS-CoV-2 Predicted by Comparative and Structural Analysis of  
293 ACE2 in Vertebrates, Preprint at: <https://www.ncbi.nlm.nih.gov/pubmed/32511356>  
294 (2020).
- 295 18 Liu, Y. *et al.* Functional and Genetic Analysis of Viral Receptor ACE2 Orthologs Reveals Broad Potential  
296 Host Range of SARS-CoV-2, Preprint at: <https://www.biorxiv.org/content/10.1101/2020.04.22.046565v2>  
297 (2020).
- 298 19 Bao, L. *et al.* The pathogenicity of SARS-CoV-2 in hACE2 transgenic mice. *Nature*, doi:10.1038/s41586-  
299 020-2312-y (2020).
- 300 20 Hassan, A. O. *et al.* A SARS-CoV-2 Infection Model in Mice Demonstrates Protection by Neutralizing  
301 Antibodies. *Cell*, doi:10.1016/j.cell.2020.06.011 (2020).
- 302 21 Dinno, K. H. *et al.* A mouse-adapted SARS-CoV-2 model for the evaluation of COVID-19 medical  
303 countermeasures, Preprint at: <https://www.ncbi.nlm.nih.gov/pubmed/32511406> (2020).
- 304 22 Gu, H. *et al.* Rapid adaptation of SARS-CoV-2 in BALB/c mice: Novel mouse model for vaccine efficacy,  
305 Preprint at: <https://www.biorxiv.org/content/10.1101/2020.05.02.073411v1> (2020).
- 306 23 Zhao, Y. *et al.* Susceptibility of tree shrew to SARS-CoV-2 infection, Preprint at:  
307 <https://www.biorxiv.org/content/10.1101/2020.04.30.029736v1> (2020).
- 308 24 Chan, J. F. *et al.* Simulation of the clinical and pathological manifestations of Coronavirus Disease 2019  
309 (COVID-19) in golden Syrian hamster model: implications for disease pathogenesis and transmissibility.  
310 *Clin. Infect. Dis.*, doi:10.1093/cid/ciaa325 (2020).
- 311 25 Sia, S. F. *et al.* Pathogenesis and transmission of SARS-CoV-2 in golden hamsters. *Nature*,  
312 doi:10.1038/s41586-020-2342-5 (2020).
- 313 26 Shi, J. *et al.* Susceptibility of ferrets, cats, dogs, and other domesticated animals to SARS-coronavirus 2.  
314 *Science* **368**, 1016-1020, doi:10.1126/science.abb7015 (2020).
- 315 27 Kim, Y. I. *et al.* Infection and Rapid Transmission of SARS-CoV-2 in Ferrets. *Cell Host Microbe* **27**, 704-  
316 709 e702, doi:10.1016/j.chom.2020.03.023 (2020).
- 317 28 Schlottau, K. *et al.* SARS-CoV-2 in fruit bats, ferrets, pigs, and chickens: an experimental transmission  
318 study. *The Lancet Microbe*, doi:10.1016/S2666-5247(20)30089-6.
- 319 29 Munster, V. J. *et al.* Respiratory disease in rhesus macaques inoculated with SARS-CoV-2. *Nature*,  
320 doi:10.1038/s41586-020-2324-7 (2020).
- 321 30 Lu, S. *et al.* Comparison of SARS-CoV-2 infections among 3 species of non-human primates, Preprint at:  
322 <https://www.biorxiv.org/content/10.1101/2020.04.08.031807v1> (2020).
- 323 31 Woolsey, C. *et al.* Establishment of an African green monkey model for COVID-19, Preprint at:  
324 <https://www.ncbi.nlm.nih.gov/pubmed/32511377> (2020).
- 325 32 Halfmann, P. J. *et al.* Transmission of SARS-CoV-2 in Domestic Cats. *N. Engl. J. Med.*,  
326 doi:10.1056/NEJMc2013400 (2020).
- 327 33 United States Department of Agriculture. USDA Statement on the Confirmation of COVID-19 in a Tiger in  
328 New York. (2020).

- 329 34 Oreshkova, N., Molenaar, R.-J., Vreman, S., Harders, F. & Munnink, B. B. O. SARS-CoV2 infection in  
330 farmed mink, Netherlands, April 2020, Preprint at:  
331 <https://www.biorxiv.org/content/10.1101/2020.05.18.101493v1> (2020).
- 332 35 Zhang, Q. *et al.* SARS-CoV-2 neutralizing serum antibodies in cats: a serological investigation, Preprint at:  
333 <https://www.biorxiv.org/content/10.1101/2020.04.01.021196v1> (2020).
- 334 36 Sit, T. H. C. *et al.* Infection of dogs with SARS-CoV-2. *Nature*, doi:10.1038/s41586-020-2334-5 (2020).
- 335 37 Bosler, E. M., Ormiston, B. G., Coleman, J. L., Hanrahan, J. P. & Benach, J. L. Prevalence of the Lyme  
336 disease spirochete in populations of white-tailed deer and white-footed mice. *Yale J. Biol. Med.* **57**, 651-  
337 659 (1984).
- 338 38 Brown, R. N. & Lane, R. S. Natural and experimental *Borrelia burgdorferi* infections in woodrats and deer  
339 mice from California. *J. Wildl. Dis.* **30**, 389-398, doi:10.7589/0090-3558-30.3.389 (1994).
- 340 39 El Khoury, M. Y. *et al.* Potential role of deer tick virus in Powassan encephalitis cases in Lyme disease-  
341 endemic areas of New York, U.S.A. *Emerg. Infect. Dis.* **19**, 1926-1933, doi:10.3201/eid1912.130903  
342 (2013).
- 343 40 Knust, B. & Rollin, P. E. Twenty-year summary of surveillance for human hantavirus infections, United  
344 States. *Emerg. Infect. Dis.* **19**, 1934-1937, doi:10.3201/eid1912.131217 (2013).
- 345 41 Botten, J. *et al.* Persistent Sin Nombre virus infection in the deer mouse (*Peromyscus maniculatus*) model:  
346 sites of replication and strand-specific expression. *J. Virol.* **77**, 1540-1550, doi:10.1128/JVI.77.2.1540-  
347 1550.2003 (2003).
- 348 42 Luan, J., Lu, Y., Jin, X. & Zhang, L. Spike protein recognition of mammalian ACE2 predicts the host range  
349 and an optimized ACE2 for SARS-CoV-2 infection. *Biochem. Biophys. Res. Commun.* **526**, 165-169,  
350 doi:10.1016/j.bbrc.2020.03.047 (2020).
- 351 43 Procko, E. The sequence of human ACE2 is suboptimal for binding the S spike protein of SARS  
352 coronavirus 2, Preprint at: <https://www.biorxiv.org/content/10.1101/2020.03.16.994236v3> (2020).
- 353 44 Gong, J. *et al.* A Tool to Early Predict Severe 2019-Novel Coronavirus Pneumonia (COVID-19) : A  
354 Multicenter Study using the Risk Nomogram in Wuhan and Guangdong, China, Preprint at:  
355 <https://www.medrxiv.org/content/10.1101/2020.03.17.20037515v1.full.pdf> (2020).
- 356 45 Liu, J. *et al.* Neutrophil-to-Lymphocyte Ratio Predicts Severe Illness Patients with 2019 Novel Coronavirus  
357 in the Early Stage, Preprint at: <https://www.medrxiv.org/content/10.1101/2020.02.10.20021584v1> (2020).
- 358 46 Oko, L. *et al.* Profiling helper T cell subset gene expression in deer mice. *BMC Immunol* **7**, 18,  
359 doi:10.1186/1471-2172-7-18 (2006).
- 360 47 Schountz, T. *et al.* Kinetics of immune responses in deer mice experimentally infected with Sin Nombre  
361 virus. *J. Virol.* **86**, 10015-10027, doi:10.1128/JVI.06875-11 (2012).
- 362 48 Warner, B. M. *et al.* Development and Characterization of a Sin Nombre Virus Transmission Model in  
363 *Peromyscus maniculatus*. *Viruses* **11**, doi:10.3390/v11020183 (2019).
- 364 49 Brocato, R. L. & Hooper, J. W. Progress on the Prevention and Treatment of Hantavirus Disease. *Viruses*  
365 **11**, doi:10.3390/v11070610 (2019).
- 366 50 Leroy, E. M., Ar Gouilh, M. & Brugere-Picoux, J. The risk of SARS-CoV-2 transmission to pets and other  
367 wild and domestic animals strongly mandates a one-health strategy to control the COVID-19 pandemic.  
368 *One Health*, 100133, doi:10.1016/j.onehlt.2020.100133 (2020).
- 369 51 Blehert, D. S. *et al.* Bat white-nose syndrome: an emerging fungal pathogen? *Science* **323**, 227,  
370 doi:10.1126/science.1163874 (2009).

## 371 372 **Methods References**

- 373  
374 52 Hall, E. *The mammals of North America*. (John Wiley and Sons, 1981).
- 375 53 Griffin, B. D. *et al.* Establishment of an RNA polymerase II-driven reverse genetics system for Nipah virus  
376 strains from Malaysia and Bangladesh. *Sci Rep* **9**, 11171, doi:10.1038/s41598-019-47549-y (2019).
- 377 54 Corman, V. M. *et al.* Detection of 2019 novel coronavirus (2019-nCoV) by real-time RT-PCR. *Euro*  
378 *Surveill* **25**, doi:10.2807/1560-7917.ES.2020.25.3.2000045 (2020).
- 379 55 Schountz, T., Shaw, T. I., Glenn, T. C., Feldmann, H. & Prescott, J. Expression profiling of lymph node  
380 cells from deer mice infected with Andes virus. *BMC Immunol* **14**, 18, doi:10.1186/1471-2172-14-18  
381 (2013).
- 382 56 Livak, K. J. & Schmittgen, T. D. Analysis of relative gene expression data using real-time quantitative PCR  
383 and the 2(-Delta Delta C(T)) Method. *Methods* **25**, 402-408, doi:10.1006/meth.2001.1262 (2001).



- 384 57 Mendoza, E. J., Manguiat, K., Wood, H. & Drebot, M. Two Detailed Plaque Assay Protocols for the  
385 Quantification of Infectious SARS-CoV-2. *Curr Protoc Microbiol* **57**, ecpmc105, doi:10.1002/cpmc.105  
386 (2020).
- 387 58 Madeira, F. *et al.* The EMBL-EBI search and sequence analysis tools APIs in 2019. *Nucleic Acids Res.* **47**,  
388 W636-W641, doi:10.1093/nar/gkz268 (2019).
- 389 59 Katoh, K. & Standley, D. M. MAFFT multiple sequence alignment software version 7: improvements in  
390 performance and usability. *Mol. Biol. Evol.* **30**, 772-780, doi:10.1093/molbev/mst010 (2013).
- 391 60 Castresana, J. Selection of conserved blocks from multiple alignments for their use in phylogenetic  
392 analysis. *Mol. Biol. Evol.* **17**, 540-552, doi:10.1093/oxfordjournals.molbev.a026334 (2000).
- 393 61 Stamatakis, A. RAxML version 8: a tool for phylogenetic analysis and post-analysis of large phylogenies.  
394 *Bioinformatics* **30**, 1312-1313, doi:10.1093/bioinformatics/btu033 (2014).
- 395 62 Darriba, D. *et al.* ModelTest-NG: A New and Scalable Tool for the Selection of DNA and Protein  
396 Evolutionary Models. *Mol. Biol. Evol.* **37**, 291-294, doi:10.1093/molbev/msz189 (2020).

## 397 **Figure Legends**

398

### 399 **Figure 1: Deer mouse range and predicted susceptibility to SARS-CoV-2.**

400 **a**, Phylogeny showing the relationships among selected members of the *Cricetidae* family with  
401 mice and humans. **b**, Geographical distribution of deer mice (based on data from Hall, 1981)<sup>52</sup>.  
402 **c**, Alignment of human Ace2 (hAce2) amino acid residues known to confer efficient binding of  
403 the RBD of SARS-CoV-2 spike with the corresponding Ace2 amino acid residues from selected  
404 members of the *Cricetidae* family and other naturally or experimentally susceptible host species.  
405 The physiochemical properties of the amino acids residues are indicated: non-polar (yellow),  
406 polar (green), acidic (red), and basic residues (blue).

407

### 408 **Figure 2: SARS-CoV-2 infection of adult deer mice.**

409 **a - m** Eight to thirty two-week old female or male deer mice (*P. maniculatus*) were inoculated  
410 with  $10^5$  TCID<sub>50</sub> or  $10^6$  TCID<sub>50</sub> of SARS-CoV-2 by an intranasal route (i.n.) of administration  
411 and compared to age-matched uninfected controls. Bars indicate means. Dashed lines and dotted  
412 lines indicate the limit of detection for the TCID<sub>50</sub> assay and qRT-PCR assay, respectively. **a-b**,  
413 Kaplan-Meier curve depicting survival data (**a**) and weight data (**b**) over the course of 21 days  
414 following SARS-CoV-2 exposure (challenge dose,  $10^5$  TCID<sub>50</sub>). **c-f**, Infectious viral load (filled  
415 in circles, left axis) and vRNA levels (empty circles, right axis) in the (**c**) nasal turbinates, (**d**)  
416 lung, (**e**) small intestine, and (**f**) colon (challenge dose,  $10^5$  TCID<sub>50</sub>). **g-h**, Infectious viral load  
417 (filled in circles with bars, left axis) and viral RNA levels (empty circles, right axis) in (**g**)  
418 oropharyngeal swabs and (**h**) rectal swab samples (challenge dose,  $10^5$  TCID<sub>50</sub>). **i**, Viral RNA  
419 levels in nasal washes at 6 dpi (infectious dose,  $10^5$  TCID<sub>50</sub>). **j-l**, Viral RNA levels in the (**j**)  
420 urine, (**k**) feces, and (**l**) blood at the indicated times post-infection (infectious dose,  $10^6$  TCID<sub>50</sub>).  
421 **m**, Viral RNA levels in the nasal turbinates, lung, and small intestines at 21 days post-infection  
422 (infectious dose,  $10^5$  TCID<sub>50</sub>). Data were collected from two independent experiments. (a-b, n =  
423 6; c-h, n = 3/6 for uninfected/infected; i-l, n = 5; m, n = 4).

424

### 425 **Figure 3: Histopathology and virus distribution.**

426 Hematoxylin/eosin (H&E) staining (left) and in situ hybridization (ISH) using antisense probes  
427 that detect the SARS-CoV-2 genome/mRNA (middle) and sense probes that detects anti-  
428 genomic RNA (right) were carried out on **a**) nasal turbinates and **b**) lung tissue of uninfected and  
429 SARS-CoV-2-infected deer mice ( $10^5$  TCID<sub>50</sub> i.n. route) at 2 and 4 dpi. Positive detection of  
430 viral genomic RNA/mRNA or anti-genomic RNA is indicated by magenta staining (middle/right  
431 panels and insets). Arrows indicate perivascular infiltrations of histiocytes and neutrophils

432 (black), peribronchiolar infiltrations of histiocytes and neutrophils (orange), mild neutrophilic  
433 infiltration in the submucosa (blue), occasionally observed discrete foci of interstitial pneumonia  
434 (purple), occasionally observed multinucleated syncytial cells (magenta), and anti-genomic RNA  
435 occasionally in individual scattered bronchiolar epithelial cells (green and right inset). The  
436 magnification is 20x for H&E and 20x for ISH unless otherwise indicated. Scale bars = 100  $\mu\text{m}$  ,  
437 50  $\mu\text{m}$ , and 20  $\mu\text{m}$  for 10x, 20x, and 40x, respectively.

438

439 **Figure 4: Deer mouse host response to SARS-CoV-2 infection.**

440 **a-e**, Hematological levels and serum biochemistry were measured in uninfected and SARS-CoV-  
441 2-infected deer mice (infectious dose  $10^6$  TCID<sub>50</sub>, i.n. route) at 3 dpi, including **(a)** white blood  
442 cell, lymphocyte, and neutrophil counts, **(b)** the neutrophil-to-lymphocyte ratio, **(c)** alanine  
443 aminotransferase (ALT), **(d)** blood albumin (ALB), and **(e)** blood urea nitrogen (BUN). **f**,  
444 Cytokine gene expression was measured for TNF $\alpha$ , IL-6, IL-10, and IFN $\alpha$  in the lungs of SARS-  
445 CoV-2-infected deer mice and displayed relative to age-matched mock-infected animals. Gene  
446 expression was normalized using GAPDH as a control. **g**, IgG antibody response against SARS-  
447 CoV-2 mixed spike and nucleoprotein (S/N) antigens were assessed by ELISA using serum  
448 collected on the indicated days post-infection (infectious dose,  $10^5$  TCID<sub>50</sub>). **h**, Neutralizing  
449 antibody against SARS-CoV-2 was measured by PRNT<sub>90</sub> using serum collected at 28 days after  
450 SARS-CoV-2 infection (infectious dose,  $10^5$  TCID<sub>50</sub>). Dotted lines indicate the limit of  
451 detection. Bars indicate mean, error bars indicate SEM (c-e) or 95% confidence interval (f). (a-b,  
452 n = 5/3 for uninfected/infected; c-e, n = 5/4 for uninfected/infected, f, n = 6, g-h, n = 5 or 6) \* =  
453  $P < 0.05$ , ns =  $P > 0.05$ , Mann-Whitney test (b), unpaired t test (c-e).

454

455 **Figure 5: Transmission of SARS-CoV-2 between deer mice through direct contact.**

456 **a-g**, Adult male and female deer mice were exposed to  $10^6$  TCID<sub>50</sub> SARS-CoV-2 by an i.n. route  
457 of infection. At 1 dpi individual inoculated donor deer mice were transferred to a new cage and  
458 co-housed with a single naïve deer mouse (1:1 ratio) to assess SARS-CoV-2 transmission by  
459 direct contact. Deer mice were either maintained in direct contact throughout the 10 day study  
460 for serial swabbing or humanely euthanized on 2 or 4 days post-contact (dpc) for tissue  
461 collection. **a-d**, Viral RNA levels (**a**, **b**) and infectious viral loads (**c**, **d**) were measured in  
462 oropharyngeal swabs and rectal swab samples every other day from -1 to 10 days after direct  
463 contact was initiated. Oropharyngeal or rectal swab samples obtained from the same animal are  
464 demarcated with a unique colour, and samples derived from co-housed pairs share the same  
465 symbol. **e-f**, An additional transmission study was carried out in the same manner and nasal  
466 wash, nasal turbinates, and lung samples were collected from contact animals at **(e)** 2 dpc and **(f)**  
467 4 dpc. **g**, IgG antibody response (reciprocal serum dilution) against SARS-CoV-2 S and N in  
468 donor and direct-contact exposed animals were assessed by ELISA using serum collected at 21  
469 dpc. **h-i**, In an additional study adult male and female deer mice were exposed to  $10^5$  TCID<sub>50</sub>  
470 SARS-CoV-2 by an intranasal route of infection. At 2 dpi individual inoculated donor deer mice  
471 were transferred to a new cage and co-housed with a single naïve deer mouse (1:1 ratio) to assess  
472 SARS-CoV-2 transmission by direct contact (n = 5). Viral RNA levels were measured in **(h)**  
473 oropharyngeal swabs and **(i)** rectal swab samples every other day from 0 to 14 days after direct  
474 contact was initiated, and final swab samples were collected at 21 dpi and assessed. Dotted or  
475 dashed lines indicate the limit of detection. Bars indicate means. Data were collected from two  
476 independent experiments.

477

## 478 **Methods**

479

### 480 **Ethics statement**

481 The experiments described in this study were carried out at the National Microbiology  
482 Laboratory (NML) at the Public Health Agency of Canada as described in the Animal use  
483 document AUD# H-20-006. Experiment were approved by the Animal Care Committee located  
484 at the Canadian Science Center for Human and Animal Health in accordance with the guidelines  
485 provided by the Canadian Council on Animal Care. All procedures were performed under  
486 anesthesia, and all efforts were made to minimize animal suffering and to reduce the number of  
487 animals used. All infectious work was performed under biosafety level 3 (BSL-3) conditions or  
488 higher.

489

### 490 **Viruses**

491 The SARS-CoV-2 strain used in these studies (SARS-CoV-2; hCoV- 19/Canada/ON-VIDO-  
492 01/2020, GISAID accession# EPI\_ISL\_425177) was isolated from a clinical specimen obtained at  
493 the Sunnybrook Research Institute (SRI)/ University of Toronto on VeroE6 cells and provided by  
494 the Vaccine and Infectious Disease Organization (VIDO) with permission. The P1 virus was  
495 subsequently passaged at a 1:1000 dilution on mycoplasma-free VeroE6 cells (ATCC) in  
496 Dulbecco's Modified Eagle's Medium (Hyclone) containing 1% L-glutamine and 0.5 µg/ml of  
497 TPCK-trypsin and harvested when 80% cytopathic effect (CPE) became evident. The P2 virus  
498 stock was clarified by centrifugation at 6000 x g for 5 minutes and stored at -80°C until thawed  
499 for deer mouse infections. The virus stock was titrated on Vero cells by conventional TCID<sub>50</sub> assay,  
500 as described previously<sup>53</sup>.

501

### 502 **Deer mouse challenge experiments**

503 Deer mice (*Peromyscus maniculatus rufinus*) used in these studies were supplied by a breeding  
504 colony housed at the University of Manitoba in a pathogen-free facility. All the deer mice were  
505 acclimated for a minimum of one week prior to the initiation of experimental procedures. Deer  
506 mice were randomly assigned to their respective groups and were housed in a temperature-  
507 controlled, light-cycled facility. Deer mice were supplied with food and water ad libitum and were  
508 monitored daily throughout the course of the experiments. Thirteen to thirty two-week old male  
509 or female deer mice were infected with 10<sup>5</sup> or 10<sup>6</sup> TCID<sub>50</sub> of SARS-CoV-2 by an intranasal route  
510 (i.n.) of administration in a 50 µl volume. Blinding of the animal experiments was not performed.  
511 Sample sizes were calculated a priori, and no animals were excluded from the data analysis  
512 although at times sample volumes were insufficient to allow downstream analyses.

513

### 514 **Blood, fluids, feces, swab, and tissue collection**

515 All deer mice were exsanguinated via cardiac puncture under deep isoflurane anesthesia prior to  
516 euthanization. Whole blood and serum was collected in BD microtainer tubes (K<sub>2</sub>-EDTA or serum,  
517 respectively) (Becton, Dickinson and Company) as per the manufacturer's instructions. Serum  
518 samples were collected from the retro-orbital sinus under deep isoflurane sedation at 14, 21, and  
519 28 dpi for challenge studies and at 21 dpc for transmission studies. Oropharyngeal and rectal swabs  
520 were taken using fine tip Dryswab Fine Tip rayon swabs (MWE cat #MW113). Harvested tissue  
521 samples for infectious assays were flash frozen and stored at -80 °C until later use, and swab  
522 samples were placed in 1 ml MEM supplemented with 1% heat-inactivated FBS, 1x L-glutamine,

523 and 2x penicillin–streptomycin, flash frozen, and stored at  $-80^{\circ}\text{C}$  until later use. Tissue samples  
524 harvested for vRNA detection were immersed in RNAlater (Ambion)  $4^{\circ}\text{C}$  for 1 day, then stored  
525 at  $-80^{\circ}\text{C}$  until later use. For urine collection deer mice were gently raised from their cages using  
526 soft-tip mouse handling forceps and placed immediately onto a 35-mm petri dish, a process that  
527 consistently allowed a minimum of 25  $\mu\text{l}$  of urine to be collected. Feces samples were collected  
528 fresh from the isoflurane chamber following sedation, homogenized in 0.5 ml of 0.89% NaCl per  
529 80 mg of feces using a Bead Ruptor Elite Bead Mill Homogenizer (Omni International) with a  
530 stainless steel bead at 4 m/s for 30 seconds. The sample was then clarified for 20 minutes at 4000  
531 x g and the supernatant was filtered through a 0.2  $\mu\text{m}$  filter. Viral RNA was then isolated using  
532 the QIAamp Viral RNA Mini kit (Qiagen), as per the manufacturer's instructions.  
533

### 534 **Infectious virus in tissues and swab samples**

535 For infectious virus assays, thawed tissue samples were weighed and placed in 1 ml of MEM  
536 supplemented with 1% heat-inactivated FBS, 1x L-glutamine before being homogenized in a Bead  
537 Ruptor Elite Bead Mill Homogenizer (Omni International) at 4 m/s for 30 seconds and clarified  
538 by centrifugation at 1500 x g for 6 minutes. Swab samples were vortexed for 10 seconds and  
539 clarified at 2400 rpm for 5 minutes. Tissue homogenates or swab samples were serially diluted 10-  
540 fold in MEM supplemented with 1% heat-inactivated FBS, 1x L-glutamine, and 2x penicillin–  
541 streptomycin. One hundred microliter volumes of neat samples (swabs only) and sample dilutions  
542 were added to 96-well plates of 95% confluent Vero cells containing 50  $\mu\text{l}$  of the same medium in  
543 replicates of three and incubated for 5 days at  $37^{\circ}\text{C}$  with 5%  $\text{CO}_2$ . Plates were scored for the  
544 presence of cytopathic effect on day 5 after infection.  
545

### 546 **Viral RNA copies in tissues and swab samples**

547 For vRNA copy number analysis, tissue samples were thawed and weighed and homogenized in  
548 600  $\mu\text{l}$  RLT buffer using a Bead Ruptor Elite Bead Mill Homogenizer (Omni International) with a  
549 stainless steel bead at 4 m/s for 30 seconds. Viral RNA from 30 mg tissue samples was extracted  
550 with the RNeasy Plus Mini kit (Qiagen), and vRNA from swab samples was extracted with the  
551 QIAamp Viral RNA Mini kit (Qiagen). A SARS-CoV-2 E-specific real-time RT–PCR assay was  
552 used for the detection of vRNA<sup>54</sup>. RNA was reverse transcribed and amplified using the primers  
553 E\_Sarbeco\_F1 (5'- ACAGGTACGTTAATAGTTAATAGCGT-3') and E\_Sarbeco\_R2 (5'-  
554 ATATTGCAGCAGTACGCACACA-3') and probe E\_Sarbeco\_P1 (5'-FAM-  
555 ACACTAGCCATCCTTACTGCGCTTCG-BBQ-3') using the TaqPath 1-Step Multiplex Master  
556 Mix kit (Applied Biosystems) on a QuantStudio 5 real-time PCR system (Applied Biosystems), as  
557 per manufacturer's instructions. A standard curve was generated in parallel for each plate using  
558 synthesized DNA and used for the quantification of viral genome copy numbers. The Design and  
559 Analysis Software version 1.5.1 (ThermoFisher Scientific) was used to calculate the cycle  
560 threshold values, and a cycle threshold value  $\leq 36$  for both replicates was considered positive.  
561

### 562 **Blood counts and biochemistry**

563 Complete blood counts were carried out using a VetScan HM5 hematology system (Abaxis  
564 Veterinary Diagnostics), as per manufacturer instructions. Analysis of serum biochemistry was  
565 performed with a VetScan VS2 analyzer (Abaxis Veterinary Diagnostics), as per manufacturer  
566 instructions.  
567

568



## 569 **Transcriptional profiling of host responses**

570 RNA was extracted from tissues using the RNeasy plus mini kit (Qiagen) following the  
571 manufacturer's instructions. A two-step qRT-PCR reaction in triplicate was performed on a  
572 Quantstudio 5 (Applied Biosystems). Reverse transcription was carried out with the Superscript  
573 III RT first strand synthesis kit (Invitrogen) following DNase elimination of genomic DNA. The  
574 RT reaction was performed using 100 ng of template RNA mixed with random hexamers as  
575 primers in a 20  $\mu$ L reaction volume for 5 min at 65 °C followed by 10 min at 25 °C and 50 min at  
576 50 °C. The qPCR reaction was carried out using the PowerUp SYBR Green Master Mix (Applied  
577 Biosystems) with 2  $\mu$ L of cDNA. The cycle parameters for qPCR were 2 min at 50 °C and 2 min  
578 at 95°C followed by 40 cycles of 3 s at 95 °C and 30 s at 60 °C. The qPCR reactions were  
579 performed in a 20  $\mu$ L volume with oligonucleotide pairs specific for deer mouse TNF $\alpha$ , IL6, IL10,  
580 IFN $\alpha$ <sup>55</sup> at a concentration of 2  $\mu$ M. The fold change in gene expression of TNF $\alpha$ , IL6, IL10, IFN $\alpha$   
581 in SARS-CoV-2-infected versus uninfected deer mice were calculated using the  $\Delta\Delta$ Ct method  
582 with GAPDH as a reference gene<sup>56</sup>. GraphPad Prism's multiple t test was used to perform the  
583 second subtraction so as not to lose the variation of the mock animals.

584

## 585 **SARS-CoV-2-S-specific enzyme-linked immunosorbent assay (ELISA)**

586 SARS-CoV-2 spike/nucleoprotein (S/N)-specific IgG antibody responses were assessed using an  
587 in-house assay. Briefly, a 1:100 dilution (or a serial dilution) of deer mouse serum was carried out  
588 in duplicate and added to plates pre-coated with both the spike and nucleoprotein (S/N) antigens  
589 in the same assay wells. Deer mouse IgG was detected with a KPL peroxidase-labeled polyclonal  
590 goat antibodies against *Peromyscus leucopus* IgG (H+L) (Sera Care).

591

## 592 **Virus neutralization assay**

593 Deer mouse serum samples were collected and stored at -80°C. SARS-CoV-2 stocks were  
594 titrated and used in the PRNT<sup>57</sup>. Briefly, serum was heat-inactivated at 56°C for 30 minutes and  
595 diluted 2-fold from 1:40 to 1:1280 in DMEM supplemented with 2% FBS. Diluted sera was  
596 incubated with 50 plaque forming units of SARS-CoV-2 at 37°C and 5% CO<sub>2</sub> for 1 hour. The  
597 sera-virus mixtures were added to 24-well plates containing Vero E6 cells at 100% confluence,  
598 followed by incubation at 37 °C and 5% CO<sub>2</sub> for 1 hour. After adsorption, 1.5%  
599 carboxymethylcellulose diluted in MEM supplemented with 4% FBS, L-glutamine, non-essential  
600 amino acids, and sodium bicarbonate was added to each well and plates were incubated at 37°C  
601 and 5% CO<sub>2</sub> for 72 hours. The liquid overlay was removed and cells were fixed with 10%  
602 neutral-buffered formalin for 1 hour at room temperature. The monolayers were stained with  
603 0.5% crystal violet for 10 minutes and washed with 20% ethanol. Plaques were enumerated and  
604 compared to a 90% neutralization control. The PRNT-90 endpoint titre was defined as the  
605 highest serum dilution resulting in 90% reduction in plaques. PRNT-90 titers  $\geq$ 1:40 were  
606 considered positive for neutralizing antibodies.

607

## 608 **Histopathology and vRNA in situ hybridization**

609 Tissues were fixed in 10% neutral phosphate buffered formalin for two to four weeks.  
610 Subsequently, routine processing was carried out and tissue samples were sectioned at 5  $\mu$ m. A  
611 set of slides was stained with hematoxylin and eosin for histopathologic examination. RNA in  
612 situ hybridization (ISH) was carried out using RNAscope 2.5 HD Detection Reagent-Red  
613 (Advanced Cell Diagnostics), according to the manufacturer's instructions. Briefly, formalin-  
614 fixed, paraffin-embedded tissue samples of the various tissues were mounted on slides, baked in

615 a dry oven for 1 hour at 60 °C, and deparaffinized. Tissue sections were then pre-treated with  
616 RNAscope H<sub>2</sub>O<sub>2</sub> to block endogenous peroxidases for 10 minutes at room temperature. Target  
617 retrieval was carried out using the RNAscope Target Retrieval Reagent for 15 minutes.  
618 RNAscope Protease Plus Reagent was then applied for 15 minutes at 40 °C. The probes targeting  
619 SARS-CoV-2 RNA (V-nCoV2019-S probe, ref#848561) or anti-genomic RNA (V-nCoV2019-  
620 S-sense ref#845701) were designed and manufactured by Advanced Cell Diagnostics. The  
621 negative probe was also obtained from Advanced Cell Diagnostics (Reference # 310034). The  
622 stained tissues were counterstained with Gills I Hematoxylin, and the final images were captured  
623 using a light microscope equipped with a digital camera.

624

### 625 **SARS-CoV-2 transmission studies**

626 Eight to thirty two-week old female or male deer mice were challenged with 10<sup>5</sup> or 10<sup>6</sup> TCID<sub>50</sub>  
627 of SARS-CoV-2 by an intranasal route (i.n.) of administration in a 50 µl volume. At 24 or 48 hpi  
628 (for 10<sup>6</sup> TCID<sub>50</sub> and 10<sup>5</sup> TCID<sub>50</sub>, respectively) experimentally infected deer mice were placed  
629 into a fresh cage with a naïve cage mate to assess direct contact transmission (donor:contacts at  
630 1:1 ratio). Deer mice were monitored daily for clinical signs and/or weight loss. Oropharyngeal  
631 and rectal swab samples were taken on alternate days up to 10 DPI or 14 DPI (for 10<sup>6</sup> TCID<sub>50</sub>  
632 and 10<sup>5</sup> TCID<sub>50</sub>, respectively), and oropharyngeal and rectal swabs as well as serum samples  
633 were collected at 21 dpc.

634

### 635 **Bioinformatic analyses**

636 Ace2 sequences were aligned with Clustal Omega<sup>58</sup>. For the phylogenetic analysis,  
637 mitochondrial genome sequences (see Accession codes) were aligned with MAFFT v7.467<sup>59</sup>,  
638 with regions of poor alignment trimmed with Gblocks v0.91b<sup>60</sup> resulting in a final alignment of  
639 15,393bp in 115 blocks of minimum 5bp lengths. A maximum likelihood phylogeny was  
640 constructed with RAXML v8.2.12<sup>61</sup> using the GTR+I+G4 substitution model as selected by  
641 modeltest-ng<sup>62</sup>.

642

### 643 **Data analysis**

644 Results were analyzed and graphed using Prism 8 software (Graphpad Software). As appropriate,  
645 statistical analyses were performed using ANOVA with multiple comparison correction, the  
646 multiple t test, or the unpaired t test with Welch's correction or Mann-Whitney test.

647

### 648 **Accession codes**

649 Ace2 sequences: Deer Mouse (*Peromyscus maniculatus bairdii*; XP\_006973269), White-footed  
650 Mouse (*Peromyscus leucopus*; XP\_028743609), Syrian Hamster (*Mesocricetus auratus*;  
651 XP\_005074266), Chinese Hamster (*Cricetulus griseus*; XP\_003503283), Mouse (*Mus Musculus*;  
652 ABN80105), Human (*Homo sapiens*; ACT66268), Masked Palm Civet (AAX63775), Fruit Bat  
653 (*Rousettus aegyptiacus*; XP\_015974412), Chinese rufous horseshoe bat (*Rhinolophus sinicus*;  
654 ADN93472.1), Domestic cat (*Felis catus*; AAX59005), Ferret (*Mustela putorius furo*;  
655 BAE53380), and Prairie Vole (*Microtus ochrogaster*; XP\_005358818). Mitochondrial genomes:  
656 *Peromyscus maniculatus* (NC\_039921.1), *Peromyscus leucopus* (NC\_037180.1), *Mesocricetus*  
657 *auratus* (NC\_013276.1), *Cricetulus griseus* (NC\_007936.1), *Mus musculus* (NC\_005089.1).

658

### 659 **Data availability**

660 All relevant data are available from the authors upon request.

661

## 662 **Acknowledgements**

663 We thank Samira Mubareka of Sunnybrook Research Institute and University of Toronto for  
664 providing the clinical sample and Darryl Falzarano of Vaccine and Infectious Disease  
665 Organization - International Vaccine Centre (VIDO-InterVac) for isolation of the SARS-CoV-2  
666 strain used in these studies. The authors also thank Michelle French, Kimberly Azaransky,  
667 Stephanie Kucas and Christine DeGraff of the Veterinary Technical Services at the National  
668 Microbiology Laboratory (NML) for their technical assistance during the course of this work.  
669 The work described in this manuscript was financially supported by the Public Health Agency of  
670 Canada and the Canadian Food Inspection Agency.

671

## 672 **Author Contributions**

673 The experiments were conceived of and designed by BDG, DS, and DK. The phylogenetic  
674 analysis was performed by ATD. The Ace2 alignment analysis was carried out by BDG and EM.  
675 The virus was propagated and titered by AL, and DK. Animal husbandry, infection and sample  
676 collection was carried out by BDG, MC, NT, BMW, AA, KT, and DK. Infectious virus assays  
677 were performed by BDG and MC. Sample inactivation and RNA extractions were carried out by  
678 BDG, NT, AL, BMW, LG, KNT, RV, and ABo. Real-time RT-PCR was performed by BDG  
679 and NT. Transcriptional profiling of host responses was carried out by BMW and NT. Blood  
680 counts, biochemistry, and pathology analysis was performed and interpreted by BDG, AB, GP,  
681 JS, CEH, and DK. ELISA was developed and carried out by AL and SH. PRNT assays were  
682 developed and carried out by EM, HW, and MD. Histopathology and ISH was carried out by  
683 EMo and pathology was assessed by CEH. Statistical analysis was performed by JA. Figures  
684 were prepared by BDG, EM, and LB. Interpretation of potential impacts on wild deer mice and  
685 deer mouse ecology was done by LRL and CMJ. The initial draft of the manuscript was written  
686 by BDG and DK, with all other authors contributing to editing into the manuscript into its final  
687 form. The work was managed and supervised by BDG, MC, LF, CEH, and DK.

688

## 689 **Conflict of Interest**

690 The authors declare no conflicts of interest.

## 691 **Extended Data**

692 **Extended Data Figure 1.** Viral burden in the tissues by age.

693 **Extended Data Figure 2.** Histological analysis of lungs at 21 days following SARS-CoV-2  
694 exposure.

695 **Extended Data Figure 3.** Serum biochemical values.

696 **Extended Data Figure 4.** Schematic of deer mouse SARS-CoV-2 transmission studies 1 and 2  
697 design.

698

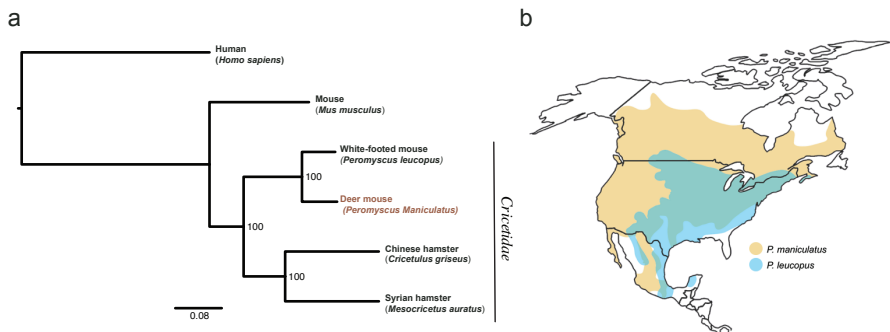

**c**

| Species                      | ACE2, SARS-CoV-2 spike contacting residues |     |     |     |     |     |     |     |     |     |     |     |     |     |      |      | Congruence with hAce2, spike contacting residues |      |      |               |               |
|------------------------------|--------------------------------------------|-----|-----|-----|-----|-----|-----|-----|-----|-----|-----|-----|-----|-----|------|------|--------------------------------------------------|------|------|---------------|---------------|
|                              | Q24                                        | T27 | K31 | H34 | E35 | E37 | D38 | Y41 | Q42 | L45 | L79 | M82 | Y83 | N90 | Q325 | E329 | N330                                             | K333 | G354 | AA identity   | AA polarity   |
| Human (hAce2)                |                                            |     |     |     |     |     |     |     |     |     |     |     |     |     |      |      |                                                  |      |      | -             | -             |
| Syrian hamster               | Q                                          | T   | K   | Q   | E   | E   | D   | Y   | Q   | L   | L   | N   | Y   | N   | Q    | E    | N                                                | K    | G    | 89.5% (17/19) | 89.5% (17/19) |
| Chinese hamster              | Q                                          | T   | K   | Q   | E   | E   | D   | Y   | Q   | L   | L   | N   | Y   | N   | Q    | G    | N                                                | K    | G    | 84.2% (16/19) | 84.2% (16/19) |
| Cat                          | L                                          | T   | K   | H   | E   | E   | E   | Y   | Q   | L   | L   | T   | Y   | N   | Q    | E    | N                                                | K    | G    | 84.2% (16/19) | 86.5% (17/19) |
| White-footed mouse           | Q                                          | I   | K   | Q   | E   | E   | D   | Y   | Q   | L   | L   | N   | Y   | N   | Q    | E    | N                                                | K    | G    | 84.2% (16/19) | 84.2% (16/19) |
| Deer mouse                   | Q                                          | I   | K   | Q   | E   | E   | D   | Y   | Q   | L   | L   | N   | Y   | N   | Q    | R    | N                                                | K    | G    | 78.9% (15/19) | 78.9% (15/19) |
| Prairie Vole                 | D                                          | A   | K   | Q   | E   | E   | D   | Y   | Q   | L   | L   | S   | Y   | N   | Q    | E    | N                                                | K    | D    | 73.7% (14/19) | 73.7% (14/19) |
| Fruit bat                    | L                                          | T   | K   | T   | E   | E   | D   | Y   | Q   | L   | L   | T   | Y   | D   | E    | E    | K                                                | K    | G    | 68.4% (13/19) | 68.4% (13/19) |
| Chinese rufous horseshoe bat | E                                          | I   | K   | T   | K   | E   | D   | H   | Q   | L   | L   | N   | Y   | N   | E    | N    | N                                                | K    | G    | 57.9% (11/19) | 63.2% (12/19) |
| Masked Palm Civet            | L                                          | T   | T   | Y   | E   | Q   | E   | Y   | Q   | V   | L   | T   | Y   | D   | Q    | E    | N                                                | K    | G    | 57.9% (11/19) | 68.4% (13/19) |
| Ferret                       | L                                          | T   | K   | Y   | E   | E   | E   | Y   | Q   | L   | H   | T   | Y   | D   | E    | Q    | N                                                | K    | R    | 52.6% (10/19) | 57.9% (11/19) |
| Mouse                        | N                                          | T   | N   | Q   | E   | E   | D   | Y   | Q   | L   | T   | S   | F   | T   | Q    | A    | N                                                | H    | G    | 52.6% (10/19) | 68.4% (13/19) |

**Figure 1: Deer mouse range and predicted susceptibility to SARS-CoV-2.** a, Phylogeny showing the relationships among selected members of the *Cricetidae* family with mice and humans. b, Geographical distribution of deer mice (based on data from Hall, 1981)<sup>52</sup>. c, Alignment of human Ace2 (hAce2) amino acid residues known to confer efficient binding of the RBD of SARS-CoV-2 spike with the corresponding Ace2 amino acid residues from selected members of the *Cricetidae* family and other naturally or experimentally susceptible host species. The physicochemical properties of the amino acids residues are indicated: non-polar (yellow), polar (green), acidic (red), and basic residues (blue).



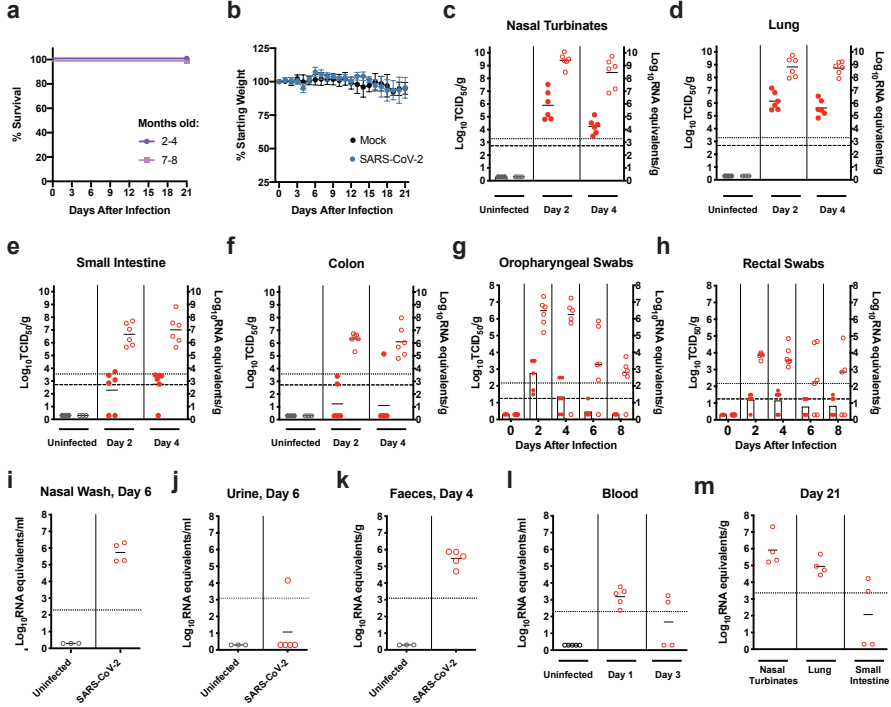

**Figure 2: SARS-CoV-2 infection of adult deer mice.** a-m Eight to thirty two-week old female or male deer mice (*P. maniculatus*) were inoculated with  $10^5$  TCID<sub>50</sub> or  $10^6$  TCID<sub>50</sub> of SARS-CoV-2 by an intranasal route (i.n.) of administration and compared to age-matched uninfected controls. Bars indicate means. Dashed lines and dotted lines indicate the limit of detection for the TCID<sub>50</sub> assay and qRT-PCR assay, respectively. a-b, Kaplan-Meier curve depicting survival data (a) and weight data (b) over the course of 21 days following SARS-CoV-2 exposure (challenge dose,  $10^5$  TCID<sub>50</sub>). c-f, Infectious viral load (filled in circles, left axis) and vRNA levels (empty circles, right axis) in the (c) nasal turbinates, (d) lung, (e) small intestine, and (f) colon (challenge dose,  $10^5$  TCID<sub>50</sub>). g-h, Infectious viral load (filled in circles with bars, left axis) and viral RNA levels (empty circles, right axis) in (g) oropharyngeal swabs and (h) rectal swab samples (challenge dose,  $10^5$  TCID<sub>50</sub>). i, Viral RNA levels in nasal washes at 6 dpi (infectious dose,  $10^5$  TCID<sub>50</sub>). j-l, Viral RNA levels in the (j) urine, (k) faeces, and (l) blood at the indicated times post-infection (infectious dose,  $10^5$  TCID<sub>50</sub>). m, Viral RNA levels in the nasal turbinates, lung, and small intestines at 21 days post-infection (infectious dose,  $10^5$  TCID<sub>50</sub>). Data were collected from two independent experiments. (a-b, n = 6; c-h, n = 3/6 for the uninfected/infected; i-l, n = 5; m, n = 4).

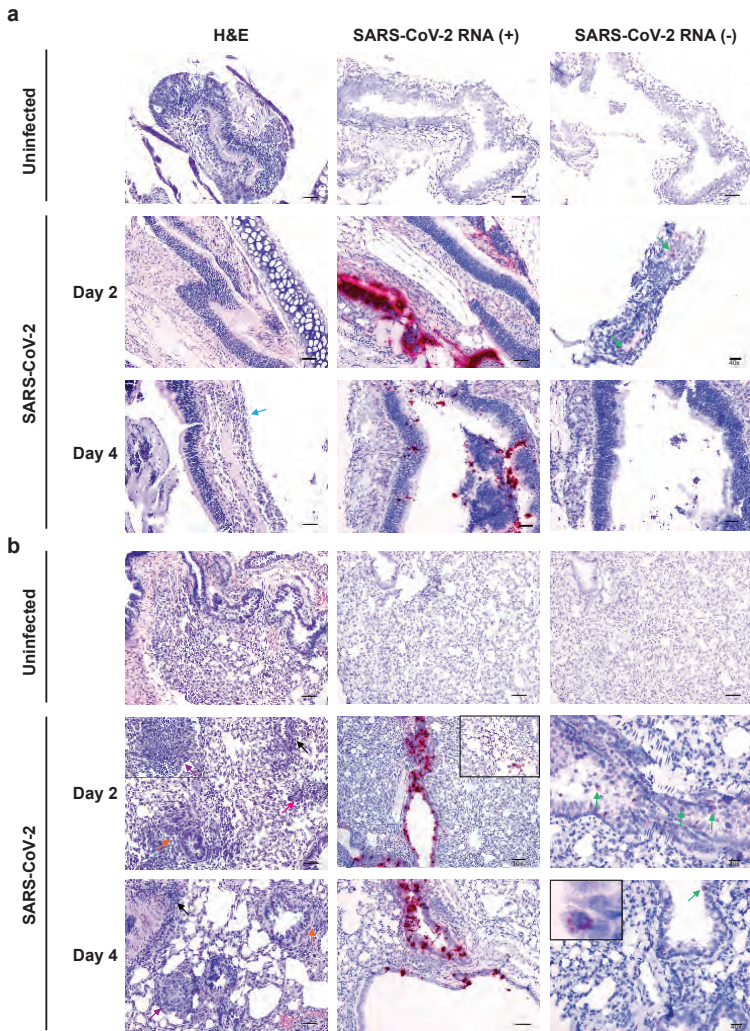

**Figure 3: Histopathology and virus distribution.** Hematoxylin/eosin (H&E) staining (left) and in situ hybridization (ISH) using anti-sense probes that detect the SARS-CoV-2 genome/mRNA (middle) and sense probes that detects anti-genomic RNA (right) were carried out on **a**) nasal turbinates and **b**) lung tissue of uninfected and SARS-CoV-2-infected deer mice ( $1 \times 10^6$  TCID<sub>50</sub> i.n. route) at 2 and 4 dpi. Positive detection of viral genomic RNA/mRNA or anti-genomic RNA is indicated by magenta staining (middle/right panels and insets). Arrows indicate perivascular infiltrations of histiocytes and neutrophils (black), peribronchiolar infiltrations of histiocytes and neutrophils (orange), mild neutrophilic infiltration in the submucosa (blue), occasionally observed discrete foci of interstitial pneumonia (purple), occasionally observed multinucleated syncytial cells (magenta), and anti-genomic RNA occasionally in individual scattered bronchiolar epithelial cells (green and right inset). The magnification is 20x for H&E and 20x for ISH unless otherwise indicated. Scale bars = 100  $\mu$ m, 50  $\mu$ m, and 20  $\mu$ m for 10x, 20x, and 40x, respectively.

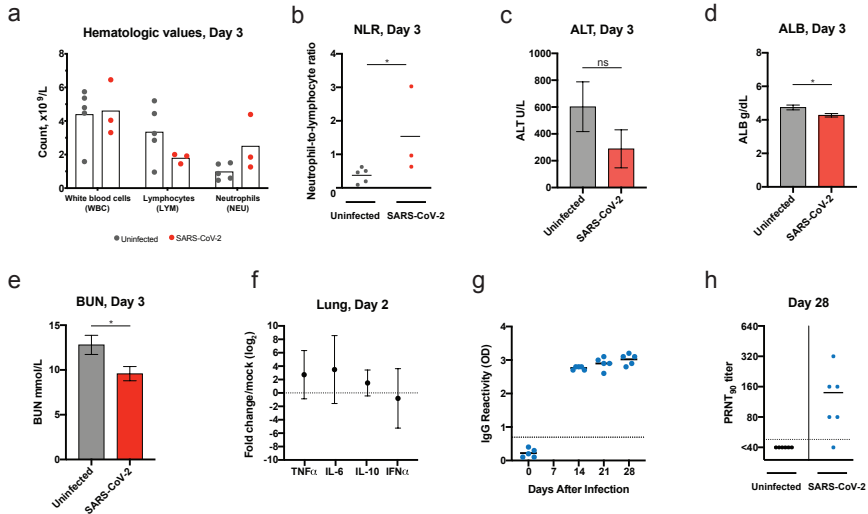

**Figure 4: Deer mouse host response to SARS-CoV-2 infection.** **a-e**, Hematological levels and serum biochemistry were measured in uninfected and SARS-CoV-2-infected deer mice (infectious dose  $10^6$  TCID<sub>50</sub> i.n. route) at 3 dpi, including **(a)** white blood cell, lymphocyte, and neutrophil counts, **(b)** the neutrophil-to-lymphocyte ratio, **(c)** alanine aminotransferase (ALT), **(d)** blood albumin (ALB), and **(e)** blood urea nitrogen (BUN). **f**, Cytokine gene expression was measured for TNF $\alpha$ , IL-6, IL-10, and IFN $\alpha$  in the lungs of SARS-CoV-2-infected deer mice and displayed relative to age-matched mock-infected animals. Gene expression was normalized using GAPDH as a control. **g**, IgG antibody response against SARS-CoV-2 mixed spike and nucleoprotein (S/N) antigens were assessed by ELISA using serum collected on the indicated days post-infection (infectious dose,  $10^5$  TCID<sub>50</sub>). **h**, Neutralizing antibody against SARS-CoV-2 was measured by PRNT<sub>90</sub> using serum collected at 28 days after SARS-CoV-2 infection (infectious dose,  $10^5$  TCID<sub>50</sub>). Dotted lines indicate the limit of detection. Bars indicate mean, error bars indicate SEM (c-e) or 95% confidence interval (f). (a-b, n = 5/3 for uninfected/infected; c-e, n = 5/4 for uninfected/infected, f, n = 6, g-h, n = 5 or 6) \* =  $P < 0.05$ , ns =  $P > 0.05$ , Mann-Whitney test (b), unpaired t test (c-e).

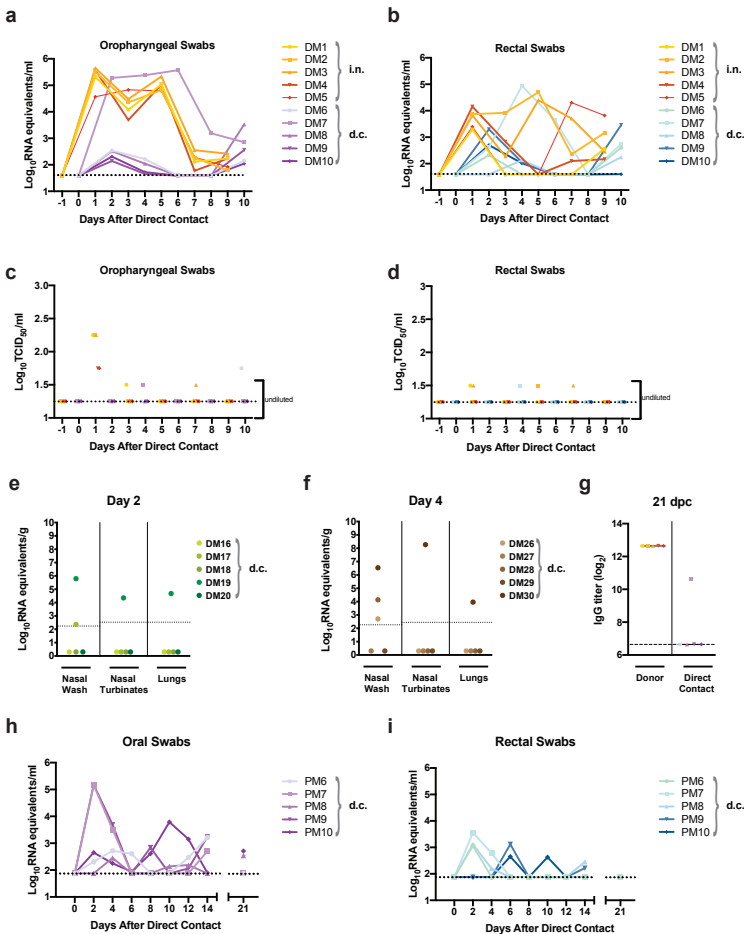

**Figure 5: Transmission of SARS-CoV-2 between deer mice through direct contact.** a-g. Adult male and female deer mice were exposed to  $10^6$  TCID<sub>50</sub> SARS-CoV-2 by an i.n. route of infection. At 1 dpi individual inoculated donor deer mice were transferred to a new cage and co-housed with a single naïve deer mouse (1:1 ratio) to assess SARS-CoV-2 transmission by direct contact. Deer mice were either maintained in direct contact throughout the 10 day study for serial swabbing or humanely euthanized on 2 or 4 days post-contact (dpc) for tissue collection. a-d. Viral RNA levels (a, b) and infectious viral loads (c, d) were measured in oropharyngeal swabs and rectal swab samples every other day from -1 to 10 days after direct contact was initiated. Oropharyngeal or rectal swab samples obtained from the same animal are demarcated with a unique colour, and samples derived from co-housed pairs share the same symbol. e-f. An additional transmission study was carried out in the same manner and nasal wash, nasal turbinates, and lung samples were collected from contact animals at (e) 2 dpc and (f) 4 dpc. g. IgG antibody response (reciprocal serum dilution) against SARS-CoV-2 S and N in donor and direct-contact exposed animals were assessed by ELISA using serum collected at 21 dpc. h-i. In an additional study adult male and female deer mice were exposed to  $10^6$  TCID<sub>50</sub> SARS-CoV-2 by an intranasal route of infection. At 2 dpi individual inoculated donor deer mice were transferred to a new cage and co-housed with a single naïve deer mouse (1:1 ratio) to assess SARS-CoV-2 transmission by direct contact (n = 5). Viral RNA levels were measured in (h) oropharyngeal swabs and (i) rectal swab samples every other day from 0 to 14 days after direct contact was initiated, and final swab samples were collected at 21 dpi and assessed. Dotted or dashed lines indicate the limit of detection. Bars indicate means. Data were collected from two independent experiments.
